# Supplementary material for: Heritable Transmission of Stress Resistance by High Dietary Glucose in Caenorhabditis elegans
Source: PubMed Central journal article supplement (PMC4006733; doi:10.1371/journal.pgen.1004346), 2014-05-01
Supplement: pgen.1004346.s004.pdf [file pgen.1004346.s004.pdf]

| Strain and treatment        | Mean lifespan | P value           | 75th percentile (days) | Maximum lifespan | Total number of deaths/total |
|-----------------------------|---------------|-------------------|------------------------|------------------|------------------------------|
| N2                          | 18            |                   | 18                     | 27               | 309/317                      |
| N2 + 4% GE P0               | 15            | <b>&lt;0,0001</b> | 16                     | 21               | 175/175                      |
| N2 + 4% GE F1               | 17            | n.s. 0,1083       | 19                     | 29               | 142/152                      |
| N2 + 4% GE F2               | 17            | n.s. 0,2327       | 18                     | 30               | 244/257                      |
| <i>daf-2(e1370)</i>         | 35            |                   | 53                     | 65               | 138/142                      |
| <i>daf-2(e1370)</i> + GE P0 | 29            | <b>&lt;0,0001</b> | 33                     | 39               | 130/132                      |
| <i>daf-2(e1370)</i> + GE F1 | 41            | n.s. 0,2965       | 49                     | 63               | 128/132                      |
| <i>daf-2(e1370)</i> + GE F2 | 33            | n.s. 0,1353       | 47                     | 65               | 122/129                      |

**Table S1**
